# Supplementary material for: Novel blaCTX-M variants and genotype-phenotype correlations among clinical isolates of extended spectrum beta lactamase-producing Escherichia coli
Source: PubMed Central journal article supplement (PMC6414621; doi:10.1038/s41598-019-39730-0), 2019-03-12
Supplement: 41598_2019_39730_MOESM1_ESM.pdf [file 41598_2019_39730_MOESM1_ESM.pdf]

---

## **Novel *ctx* Variants and Genotype-Phenotype Correlations among Clinical Isolates of Extended Spectrum Beta Lactamase-producing *Escherichia coli***

---

**Ahmed A. Ramadan<sup>1</sup>, Neveen A. Abdelaziz<sup>1</sup>, Magdy A. Amin<sup>2</sup>, Ramy K. Aziz<sup>2,3\*</sup>**

<sup>1</sup>Department of Microbiology and Immunology, Faculty of Pharmacy, Ahran Canadian University, Giza, Egypt; <sup>2</sup>Department of Microbiology and Immunology, Faculty of Pharmacy, Cairo University, Cairo, Egypt; <sup>3</sup>Center for Microbiome and Genome Research, Cairo University, Cairo, Egypt

**Running Title:** Genotype-phenotype correlations among ESBL *E. coli*

\* To whom correspondence should be addressed

Address: Department of Microbiology and Immunology, Faculty of Pharmacy, Cairo University, Qasr El-Ainy Street, 11562 Cairo, Egypt

### **CONTENTS:**

#### **Supplementary Tables:**

- Table S1** All raw data related to the isolates, their sources, their sensitivity to all tested antibiotics, and their PCR results (online file)
- Table S2** List of discs used for antimicrobial susceptibility testing
- Table S3** PCR primers for screening beta lactamase genes or determining the CTX genotypic group

#### **Supplementary Figures:**

- Figure S1** Representative *in vitro* tests used to determine the ESBL phenotypes
- Figure S2** BlastN and BlastX alignment of the newly identified *ctx* alleles to their best-matching genes

**Table S2: List of discs used for antimicrobial susceptibility testing**

| <b>Antibiotic name</b>       | <b>Abbreviation</b> | <b>Disc Content (<math>\mu\text{g}</math>)</b> |
|------------------------------|---------------------|------------------------------------------------|
| Amoxicillin/ clavulanic acid | AMC                 | 30                                             |
| Ampicillin                   | AMP                 | 10                                             |
| Aztreonam                    | ATM                 | 30                                             |
| Cefalexin                    | LEX                 | 30                                             |
| Cefotaxime                   | CTX                 | 30                                             |
| Ceftazidime                  | CAZ                 | 30                                             |
| Cefuroxime                   | CXM                 | 30                                             |
| Cefoxitin                    | FOX                 | 30                                             |
| Imipenem                     | IPM                 | 10                                             |
| Penicillin G                 | P                   | 10                                             |
| Piperacillin                 | PRL                 | 100                                            |
| Piperacillin/ Tazobactam     | TZP                 | 110                                            |

**Table S3: PCR primers for screening beta lactamase genes or determining the CTX genotypic group.**

(Prod. = product; F = forward amplification primer; R = reverse amplification primer)

| Target                                   | Oligonucleotide sequence (5' to 3')                                  | Prod. size | Purpose                                 | Source           |
|------------------------------------------|----------------------------------------------------------------------|------------|-----------------------------------------|------------------|
| <i>bla</i><br><i>TEM</i>                 | F: TCGTGTGCGCCCTTATTCCCTT<br>R: GCGGTTAGCTCCTCCGGTCCT                | 409        | PCR screening for beta-lactamase type   | Ref 1            |
| <i>bla</i><br><i>SHV</i>                 | F: CGGCCCGCAGGATTGACT<br>R: TCCCGGCGATTTGCTGATTC                     | 391        | PCR screening for beta-lactamase type   | Ref 1            |
| <i>bla</i><br><i>CTX-M-1</i>             | F: GTTAATTCGTCTCTCCAGAATAAGG<br>R: GCTTATTCATCGCCACGTTATC            | 453        | PCR screening for beta-lactamase type   | This study       |
| <i>bla</i><br><i>CTX-M-2</i>             | F: CGATGTGCAGTACCAGTAA<br>R: TTAGTGACCAGAATCAGCGG                    | 585        | PCR screening for beta-lactamase type   | Ref 2            |
| <i>bla</i><br><i>CTX-M-9</i>             | F: GAGAGTGCAACGGATGATGT<br>R: CGGTATTCAGCGTAGGTTCA                   | 512        | PCR screening for beta-lactamase type   | This study       |
| <i>bla</i><br><i>CTX-M-15</i>            | F: GCGCTACAGTACAGCGATAA<br>R: TTTACCCAGCGTCAGATTCC                   | 428        | PCR screening for beta-lactamase type   | This study       |
| <i>bla</i><br><i>CTX-M-25</i>            | F: CTGGGTGTGGCGTTGATTA<br>R: TCGTGCCATTGACGTGTT                      | 213        | PCR screening for beta-lactamase type   | This study       |
| <b>Group 1</b><br><b>CTX</b>             | F: AAAAATCACTGCGCCAGTTC<br>R: AGCTTATTCATCGCCACGTT                   | 415        | Multiplex PCR for CTX genotyping        | Ref 3 cited in 4 |
| <b>Group 2</b><br><b>CTX</b>             | F: CGACGCTACCCCTGCTATT<br>R: CCAGCGTCAGATTTTTCAGG                    | 552        | Multiplex PCR for CTX genotyping        | Ref 3 cited in 4 |
| <b>Group 8</b><br><b>CTX</b>             | F: TCGCGTTAAGCGGATGATGC<br>R: AACCCACGATGTGGGTAGC                    | 666        | Multiplex PCR for CTX genotyping        | Ref 3 cited in 4 |
| <b>Group 9</b><br><b>CTX</b>             | F: CAAAGAGAGTGCAACGGATG<br>R: ATTGGAAAGCGTTCATCACC                   | 205        | Multiplex PCR for CTX genotyping        | Ref 3 cited in 4 |
| <b>Group 25</b><br><b>CTX</b>            | F: GCACGATGACATTCCGGG<br>R: AACCCACGATGTGGGTAGC                      | 327        | Multiplex PCR for CTX genotyping        | Ref 3 cited in 4 |
| <i>ctx-M</i><br><b>Universal primers</b> | <b>MA1:</b> SCSATGTGCAGYACCGATAA<br><b>MA2:</b> CCGCRATATGRTTGGTGGTG | variable   | Amplifying all known <i>ctx</i> alleles | Ref 5            |

Figure S1.

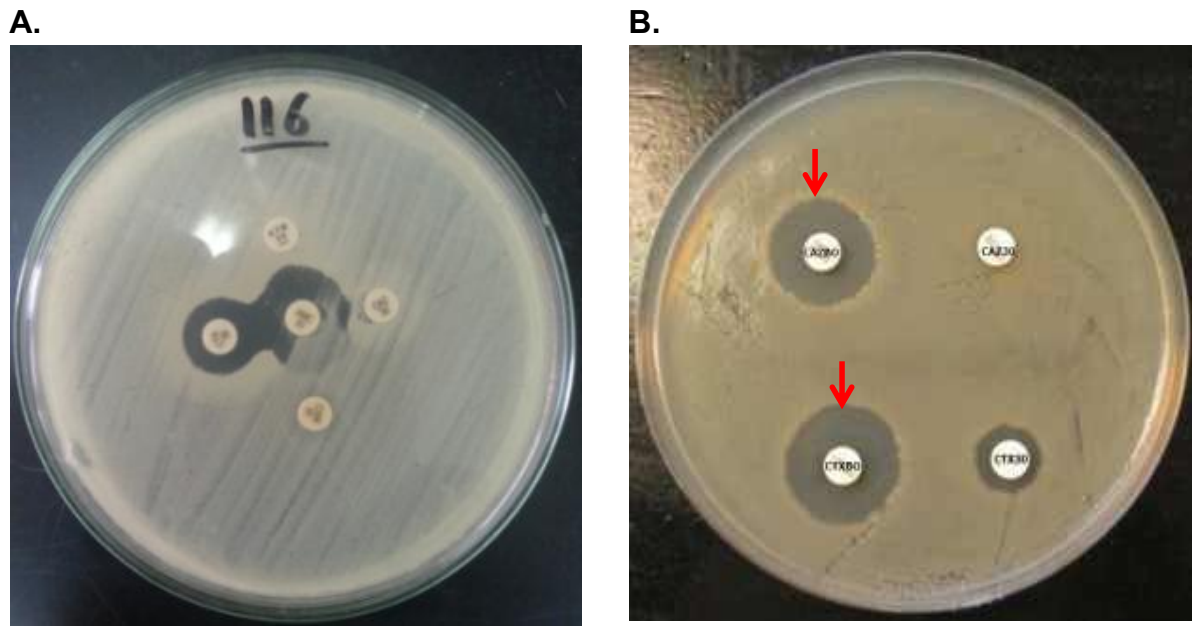

**Figure S1. Representative *in vitro* tests used to determine the ESBL phenotypes**

**A.** The typical keyhole pattern that indicates a positive ESBL isolate in the DDST. **B.** A representative positive result of the combined disc method: the zone diameter increased around the discs to which clavulanic acid was added (indicated with arrows)

## FIGURE S2

A. BlastN best hit of *ctx-M-14.2*

```

Query 1 CAGCTCGGTGGCCCGGGAGGCGTGACGGCTTTTGCCCGCGGATCGGCGATGAGACGTTT 60
      |||
Sbjct 386 CAGCTCGGTGGCCCGGGAGGCGTGACGGCTTTTGCCCGCGGATCGGCGATGAGACGTTT 327

Query 61 CGTCTGGATCGCACTGAACCTACGCTGAATACCGCCATTCCCGGCGACCCGAGAGACACC 120
      |||
Sbjct 326 CGTCTGGATCGCACTGAACCTACGCTGAATACCGCCATTCCCGGCGACCCGAGAGACACC 267

Query 121 ACCACGCCGCGGGCGATGGCACAGACGTTGCGTCAGCTTACGCTGGGTCATGCGCTGGGC 180
      |||
Sbjct 266 ACCACGCCGCGGGCGATGGCACAGACGTTGCGTCAGCTTACGCTGGGTCATGCGCTGGGC 207

Query 181 GAAACCCAGCGGGCGCAGTTGGTGACGTGGCTCAAAGGCAATACGACCGGCGCAGCCAGC 240
      |||
Sbjct 206 GAAACCCAGCGGGCGCAGTTGGTGACGTGGCTCAAAGGCAATACGACCGGCGCAGCCAGC 147

Query 241 ATTCTGGGCCGGCTTACCGACGTCGTGGACTGTAGGTGATAAGACCGGCAGCGCGACTAC 300
      |||
Sbjct 146 ATTCTGGGCCGGCTTACCGACGTCGTGGACTGTAGGTGATAAGACCGGCAGCGCGACTAC 87

Query 301 GGCACCACCAACCCATATCGCGG 322
      |||
Sbjct 86 GGCACCACCAATGATATGCGG 65

```

B. BlastX best hit of *ctx-M-14.2*

```

Query 1 QLGGPGGVTAFAARAIGDETFRLDRTEPTLNNTAIPGDPRDTTTPRAMAQTLRQLTLGHALG 180
      QLGGPGGVTAFAARAIGDETFRLDRTEPTLNNTAIPGDPRDTTTPRAMAQTLRQLTLGHALG
Sbjct 72 QLGGPGGVTAFAARAIGDETFRLDRTEPTLNNTAIPGDPRDTTTPRAMAQTLRQLTLGHALG 131

Query 181 ETQRAQLVTWLKGNNTGAASIRAGLPTSWTVGDKTGSGDYGTTNHIA 321
      ETQRAQLVTWLKGNNTGAASIRAGLPTSWTVGDKTGSGDYGTTN IA
Sbjct 132 ETQRAQLVTWLKGNNTGAASIRAGLPTSWTVGDKTGSGDYGTTNIIA 178

```

**C. BlastN best hit of *ctx-M-15.2***

```

Query      1  GCGGTGCTGCTGAGAAAGTGAAGCGAACCGAATCTGTTAAATCAGCGAGTTGAGATCAAA  60
          |||
Sbjct    2593 GCGGTGCTGAAAGAAAGTGAAGCGAACCGAATCTGTTAAATCAGCGAGTTGAGATCAAA  2652

Query     61  AAATCTGACCTTGTTAACTATAATCCGATTGCGGAAAAGCACGTCAATGGGACGATGTCA  120
          |||
Sbjct    2653 AAATCTGACCTTGTTAACTATAATCCGATTGCGGAAAAGCACGTCAATGGGACGATGTCA  2712

Query     121  CTGGCTGAGCTTAGCGCGGCCGCTACAGTACAGCGATAACGTGGCGATGAATAAGCTG  180
          |||
Sbjct    2713 CTGGCTGAGCTTAGCGCGGCCGCTACAGTACAGCGATAACGTGGCGATGAATAAGCTG  2772

Query     181  ATTGCTCACGTTGGCGGCCCGCTAGCGTCACCGCGTTCGCCCACAGCTGGGAGACGAA  240
          |||
Sbjct    2773 ATTGCTCACGTTGGCGGCCCGCTAGCGTCACCGCGTTCGCCCACAGCTGGGAGACGAA  2832

Query     241  ACGTTCGCTCTCGACCGTACCGAGCCGACGTAAACACCGCCATTCCGGGCGATCCGCGT  300
          |||
Sbjct    2833 ACGTTCGCTCTCGACCGTACCGAGCCGACGTAAACACCGCCATTCCGGGCGATCCGCGT  2892

Query     301  GATACCACTTCACCTCGGGCAATGGCGCAAACCTGCGGAATCTGACGCTGGGTAAAGCA  360
          |||
Sbjct    2893 GATACCACTTCACCTCGGGCAATGGCGCAAACCTGCGGAATCTGACGCTGGGTAAAGCA  2952

Query     361  TTGGGCGACAGCCAACGGGCGCAGCTGGTGACATGGATGAAAGGCAATACCACCGGTGCA  420
          |||
Sbjct    2953 TTGGGCGACAGCCAACGGGCGCAGCTGGTGACATGGATGAAAGGCAATACCACCGGTGCA  3012

Query     421  GCGAGCATTACAGCTGGACTGCCTGCTTCTGGGTTGTGGGGATAAAACCGGCAGCGGT  480
          |||
Sbjct    3013 GCGAGCATTACAGCTGGACTGCCTGCTTCTGGGTTGTGGGGATAAAACCGGCAGCGGT  3072

Query     481  GGCTATGGCACCACCAAC  498
          |||
Sbjct    3073 GGCTATGGCACCACCAAC  3090

```

**D. BlastX best hit of *ctx-M-15.2***

```

Query      1  AVLRSSESEPILLNQRVEIKKSDLVNYNPIAEKHVNGTMSLAELSAAALQYSDNVAMNKL  180
          |
Sbjct     12  AVLKSESEPILLNQRVEIKKSDLVNYNPIAEKHVNGTMSLAELSAAALQYSDNVAMNKL  71

Query     181  IAHVGGPASVTAFARQLGDETFRLDRTEPTLNIAIPGDPRDTTSPRAMAQLRNLTLGKA  360
          |||
Sbjct     72  IAHVGGPASVTAFARQLGDETFRLDRTEPTLNIAIPGDPRDTTSPRAMAQLRNLTLGKA  131

Query     361  LGDSQRAQLVTWMKGNTTGAASIQAGLPASWVVGDKTGSGGYGTTN  498
          |||
Sbjct    132  LGDSQRAQLVTWMKGNTTGAASIQAGLPASWVVGDKTGSGGYGTTN  177

```

**Figure S2:** BlastN and BlastX alignment of the newly identified *ctx* alleles to their best matching genes (variant nucleotides or amino acids are colored in red)

**REFERENCES:**

- 1 Liebana, E. *et al.* Characterization of beta-lactamases responsible for resistance to extended-spectrum cephalosporins in *Escherichia coli* and *Salmonella enterica* strains from food-producing animals in the United Kingdom. *Microb Drug Resist* **10**, 1-9, doi:10.1089/107662904323047745 (2004).
- 2 Batchelor, M. *et al.* bla(CTX-M) genes in clinical *Salmonella* isolates recovered from humans in England and Wales from 1992 to 2003. *Antimicrob. Agents Chemother.* **49**, 1319-1322, doi:10.1128/aac.49.4.1319-1322.2005 (2005).
- 3 Woodford, N., Fagan, E. J. & Ellington, M. J. Multiplex PCR for rapid detection of genes encoding CTX-M extended-spectrum (beta)-lactamases. *J. Antimicrob. Chemother.* **57**, 154-155, doi:10.1093/jac/dki412 (2006).
- 4 Zong, Z., Partridge, S. R., Thomas, L. & Iredell, J. R. Dominance of blaCTX-M within an Australian extended-spectrum beta-lactamase gene pool. *Antimicrob. Agents. Chemother.* **52**, 4198-4202, doi:10.1128/aac.00107-08 (2008).
- 5 Saladin, M. *et al.* Diversity of CTX-M beta-lactamases and their promoter regions from Enterobacteriaceae isolated in three Parisian hospitals. *FEMS Microbiol. Lett.* **209**, 161-168 (2002).
